# Supplementary material
Source: publisher figshare collection journal article supplement (https://sage.figshare.com/ndownloader/files/13024022)
Supplement: Supplementary file 1 [file 13024022]

| **Supplemental Table 2-1.** Cumulative body weight gain following 5 days administration of allyl alcohol | | | | | | | | | | | | | |
| --- | --- | --- | --- | --- | --- | --- | --- | --- | --- | --- | --- | --- | --- |
|  |  |  |  | **Weight Gain (g/day)** | | | | |  |  |  |  |  | |
| **Study** | **Animal Number** | **Toxicant** | **Dose (mg/kg)** | **1** | **2** | **3** | **4** | **5** |  |  |  |  |  | |
| Definitive | 15T | Allyl Alcohol | 0 | 5 | 11 | 18 | 24 | 28 |  |  |  |  |  | |
| Definitive | 15B | Allyl Alcohol | 0 | 6 | 12 | 23 | 25 | 31 |  |  |  |  |  | |
| Definitive | 15N | Allyl Alcohol | 0 | 7 | 9 | 15 | 25 | 29 |  |  |  |  |  | |
| Definitive | 16T | Allyl Alcohol | 0 | 2 | 7 | 14 | 23 | 27 |  |  |  |  |  | |
| Definitive | 16N | Allyl Alcohol | 0 | 3 | 9 | 18 | 25 | 26 |  |  |  |  |  | |
| Definitive | 19T | Allyl Alcohol | 4.5 | 6 | 16 | 21 | 28 | 38 |  |  |  |  |  | |
| Definitive | 19B | Allyl Alcohol | 4.5 | 7 | 16 | 24 | 29 | 35 |  |  |  |  |  | |
| Definitive | 19N | Allyl Alcohol | 4.5 | 9 | 17 | 23 | 29 | 34 |  |  |  |  |  | |
| Definitive | 20T | Allyl Alcohol | 4.5 | 10 | 17 | 27 | 30 | 33 |  |  |  |  |  | |
| Definitive | 20N | Allyl Alcohol | 4.5 | 8 | 16 | 24 | 33 | 39 |  |  |  |  |  | |
| Definitive | 13T | Allyl Alcohol | 9.7 | 2 | 15 | 22 | 29 | 36 |  |  |  |  |  | |
| Definitive | 13B | Allyl Alcohol | 9.7 | 6 | 14 | 21 | 28 | 36 |  |  |  |  |  | |
| Definitive | 13N | Allyl Alcohol | 9.7 | 6 | 14 | 21 | 32 | 37 |  |  |  |  |  | |
| Definitive | 14T | Allyl Alcohol | 9.7 | 7 | 18 | 25 | 31 | 37 |  |  |  |  |  | |
| Definitive | 14N | Allyl Alcohol | 9.7 | 9 | 20 | 25 | 32 | 43 |  |  |  |  |  | |
| Definitive | 17T | Allyl Alcohol | 20.9 | 2 | 10 | 17 | 25 | 29 |  |  |  |  |  | |
| Definitive | 17B | Allyl Alcohol | 20.9 | 7 | 17 | 23 | 28 | 39 |  |  |  |  |  | |
| Definitive | 17N | Allyl Alcohol | 20.9 | 7 | 11 | 21 | 27 | 35 |  |  |  |  |  | |
| Definitive | 18T | Allyl Alcohol | 20.9 | 3 | 12 | 19 | 26 | 33 |  |  |  |  |  | |
| Definitive | 18N | Allyl Alcohol | 20.9 | 6 | 15 | 24 | 30 | 35 |  |  |  |  |  | |
|  |  |  |  |  |  |  |  |  |  |  |  |  |  | |

| **Supplemental Table 2-2.** Cumulative body weight gain following 14 days administration of allyl alcohol | | | | | | | | | | | | | | | |  | |  | |  |  |  |
| --- | --- | --- | --- | --- | --- | --- | --- | --- | --- | --- | --- | --- | --- | --- | --- | --- | --- | --- | --- | --- | --- | --- |
|  |  |  |  | **Weight Gain (g/day)** | | | | | | | | | | | | | | | | |  |  |
| **Study** | **Animal Number** | **Toxicant** | **Dose (mg/kg)** | **1** | **2** | **3** | **4** | **5** | **6** | **7** | **8** | **9** | **10** | **11** | **12** | | **13** | | **14** | |  |  |
| Definitive | 37T | Allyl Alcohol | 0 | 6 | 14 | 15 | 22 | 25 | 33 | 38 | 41 | 44 | 49 | 53 | 60 | | 60 | | 65 | |  |  |
| Definitive | 37B | Allyl Alcohol | 0 | 4 | 12 | 14 | 17 | 20 | 25 | 31 | 33 | 36 | 43 | 47 | 49 | | 48 | | 61 | |  |  |
| Definitive | 37N | Allyl Alcohol | 0 | 6 | 13 | 18 | 23 | 25 | 31 | 39 | 40 | 45 | 49 | 57 | 60 | | 58 | | 67 | |  |  |
| Definitive | 38T | Allyl Alcohol | 0 | 7 | 14 | 19 | 23 | 26 | 28 | 36 | 43 | 45 | 49 | 49 | 57 | | 58 | | 64 | |  |  |
| Definitive | 38N | Allyl Alcohol | 0 | 3 | 13 | 17 | 22 | 27 | 30 | 35 | 44 | 43 | 50 | 49 | 56 | | 56 | | 61 | |  |  |
| Definitive | 41T | Allyl Alcohol | 4.5 | 5 | 13 | 17 | 21 | 23 | 27 | 33 | 37 | 38 | 46 | 52 | 53 | | 58 | | 61 | |  |  |
| Definitive | 41B | Allyl Alcohol | 4.5 | 4 | 12 | 16 | 25 | 27 | 32 | 40 | 44 | 47 | 48 | 56 | 61 | | 63 | | 68 | |  |  |
| Definitive | 41N | Allyl Alcohol | 4.5 | 2 | 7 | 16 | 19 | 21 | 29 | 31 | 39 | 42 | 42 | 50 | 55 | | 56 | | 63 | |  |  |
| Definitive | 42T | Allyl Alcohol | 4.5 | 5 | 11 | 15 | 21 | 24 | 31 | 37 | 42 | 46 | 50 | 55 | 56 | | 61 | | 65 | |  |  |
| Definitive | 42N | Allyl Alcohol | 4.5 | 0 | 7 | 14 | 22 | 24 | 30 | 36 | 38 | 42 | 47 | 51 | 56 | | 59 | | 65 | |  |  |
| Definitive | 43T | Allyl Alcohol | 9.7 | 1 | 4 | 8 | 15 | 21 | 21 | 27 | 33 | 34 | 41 | 44 | 48 | | 51 | | 52 | |  |  |
| Definitive | 43B | Allyl Alcohol | 9.7 | 7 | 15 | 20 | 25 | 30 | 35 | 38 | 45 | 44 | 45 | 51 | 55 | | 57 | | 63 | |  |  |
| Definitive | 43N | Allyl Alcohol | 9.7 | 5 | 14 | 17 | 28 | 30 | 33 | 34 | 41 | 43 | 47 | 51 | 55 | | 56 | | 63 | |  |  |
| Definitive | 44T | Allyl Alcohol | 9.7 | 4 | -2 | -22 | -34 | -40 | -41 | -37 | -36 | -36 | -48 | -55 | -40 | | -38 | | -36 | |  |  |
| Definitive | 44N | Allyl Alcohol | 9.7 | 5 | 12 | 14 | 18 | 23 | 26 | 32 | 37 | 43 | 45 | 46 | 52 | | 57 | | 62 | |  |  |
| Definitive | 39T | Allyl Alcohol | 20.9 | 0 | 6 | 11 | 17 | 19 | 22 | 27 | 32 | 34 | 41 | 43 | 44 | | 46 | | 53 | |  |  |
| Definitive | 39B | Allyl Alcohol | 20.9 | 5 | 6 | 11 | 18 | 23 | 31 | 37 | 41 | 47 | 52 | 54 | 59 | | 67 | | 69 | |  |  |
| Definitive | 39N | Allyl Alcohol | 20.9 | 2 | 9 | 14 | 25 | 30 | 34 | 42 | 43 | 51 | 59 | 62 | 64 | | 71 | | 79 | |  |  |
| Definitive | 40T | Allyl Alcohol | 20.9 | 4 | 14 | 16 | 20 | 26 | 29 | 38 | 43 | 48 | 53 | 59 | 72 | | 69 | | 78 | |  |  |
| Definitive | 40N | Allyl Alcohol | 20.9 | 6 | 17 | 22 | 26 | 34 | 40 | 46 | 52 | 56 | 61 | 67 | 74 | | 79 | | 78 | |  |  |

| **Supplemental Table 2-3.** Cumulative body weight gain following 5 days administration of carbon tetrachloride | | | | | | | | | | | | | | | |  | |  | |
| --- | --- | --- | --- | --- | --- | --- | --- | --- | --- | --- | --- | --- | --- | --- | --- | --- | --- | --- | --- |
|  |  |  |  | **Weight Gain (g/day)** | | | | |  |  |  |  |  |  |  | |  | |  | |
| **Study** | **Animal Number** | **Toxicant** | **Dose (mg/kg)** | **1** | **2** | **3** | **4** | **5** |  |  |  |  |  |  |  | |  | |  | |
| Definitive | 21T | Carbon Tetrachloride | 0 | -19 | -13 | -8 | -2 | 6 |  |  |  |  |  |  |  | |  | |  | |
| Definitive | 21B | Carbon Tetrachloride | 0 | 4 | 9 | 13 | 18 | 25 |  |  |  |  |  |  |  | |  | |  | |
| Definitive | 21N | Carbon Tetrachloride | 0 | 5 | 14 | 20 | 24 | 26 |  |  |  |  |  |  |  | |  | |  | |
| Definitive | 22T | Carbon Tetrachloride | 0 | 8 | 14 | 16 | 23 | 27 |  |  |  |  |  |  |  | |  | |  | |
| Definitive | 22N | Carbon Tetrachloride | 0 | 8 | 12 | 18 | 23 | 29 |  |  |  |  |  |  |  | |  | |  | |
| Definitive | 25T | Carbon Tetrachloride | 20 | -1 | 10 | 12 | 20 | 29 |  |  |  |  |  |  |  | |  | |  | |
| Definitive | 25B | Carbon Tetrachloride | 20 | 0 | 6 | 7 | 14 | 22 |  |  |  |  |  |  |  | |  | |  | |
| Definitive | 25N | Carbon Tetrachloride | 20 | 6 | 11 | 21 | 25 | 32 |  |  |  |  |  |  |  | |  | |  | |
| Definitive | 26T | Carbon Tetrachloride | 20 | 1 | 12 | 14 | 18 | 27 |  |  |  |  |  |  |  | |  | |  | |
| Definitive | 26N | Carbon Tetrachloride | 20 | 4 | 16 | 17 | 21 | 31 |  |  |  |  |  |  |  | |  | |  | |
| Definitive | 27T | Carbon Tetrachloride | 92.8 | 2 | 7 | 13 | 15 | 21 |  |  |  |  |  |  |  | |  | |  | |
| Definitive | 27B | Carbon Tetrachloride | 92.8 | 0 | 8 | 13 | 17 | 26 |  |  |  |  |  |  |  | |  | |  | |
| Definitive | 27N | Carbon Tetrachloride | 92.8 | 1 | 7 | 14 | 17 | 24 |  |  |  |  |  |  |  | |  | |  | |
| Definitive | 28T | Carbon Tetrachloride | 92.8 | 2 | 5 | 9 | 11 | 22 |  |  |  |  |  |  |  | |  | |  | |
| Definitive | 28N | Carbon Tetrachloride | 92.8 | 1 | 10 | 17 | 17 | 22 |  |  |  |  |  |  |  | |  | |  | |
| Definitive | 23T | Carbon Tetrachloride | 200.0 | -8 | 6 | 6 | 18 | 18 |  |  |  |  |  |  |  | |  | |  | |
| Definitive | 23TB | Carbon Tetrachloride | 200.0 | -2 | 10 | 10 | 16 | 21 |  |  |  |  |  |  |  | |  | |  | |
| Definitive | 23N | Carbon Tetrachloride | 200.0 | 0 | 6 | 6 | 13 | 12 |  |  |  |  |  |  |  | |  | |  | |
| Definitive | 24T | Carbon Tetrachloride | 200.0 | -6 | 7 | 7 | 13 | 11 |  |  |  |  |  |  |  | |  | |  | |
| Definitive | 24N | Carbon Tetrachloride | 200.0 | 3 | 8 | -2 | 14 | 20 |  |  |  |  |  |  |  | |  | |  | |

| **Supplemental Table 2-4.** Cumulative body weight gain following 14 days administration of carbon tetrachloride | | | | | | | | | | | | | | | | |  |  |  |  |
| --- | --- | --- | --- | --- | --- | --- | --- | --- | --- | --- | --- | --- | --- | --- | --- | --- | --- | --- | --- | --- |
|  |  |  |  | **Weight Gain (g/day)** | | | | | | | | | | | | | |  |  |  |
| **Study** | **Animal Number** | **Toxicant** | **Dose (mg/kg)** | **1** | **2** | **3** | **4** | **5** | **6** | **7** | **8** | **9** | **10** | **11** | **12** | **13** | **14** |  |  |  |
| Definitive | 45T | Carbon Tetrachloride | 0 | 5 | 10 | 15 | 22 | 24 | 26 | 26 | 32 | 34 | 39 | 43 | 45 | 47 | 49 |  |  |  |
| Definitive | 45B | Carbon Tetrachloride | 0 | 3 | 11 | 16 | 20 | 26 | 29 | 35 | 37 | 45 | 46 | 53 | 55 | 61 | 60 |  |  |  |
| Definitive | 45N | Carbon Tetrachloride | 0 | 6 | 8 | 17 | 18 | 26 | 26 | 31 | 36 | 41 | 46 | 48 | 53 | 57 | 57 |  |  |  |
| Definitive | 46T | Carbon Tetrachloride | 0 | 8 | 13 | 17 | 25 | 30 | 32 | 39 | 42 | 49 | 58 | 57 | 61 | 67 | 71 |  |  |  |
| Definitive | 46N | Carbon Tetrachloride | 0 | 2 | 10 | 16 | 22 | 28 | 31 | 33 | 36 | 43 | 45 | 50 | 53 | 57 | 62 |  |  |  |
| Definitive | 49T | Carbon Tetrachloride | 20 | -6 | -2 | 8 | 16 | 15 | 20 | 23 | 25 | 27 | 36 | 39 | 41 | 43 | 50 |  |  |  |
| Definitive | 49B | Carbon Tetrachloride | 20 | -3 | 5 | 10 | 16 | 21 | 21 | 28 | 32 | 35 | 43 | 43 | 46 | 45 | 51 |  |  |  |
| Definitive | 49N | Carbon Tetrachloride | 20 | 4 | 13 | 16 | 21 | 27 | 30 | 34 | 38 | 43 | 51 | 53 | 55 | 58 | 66 |  |  |  |
| Definitive | 50T | Carbon Tetrachloride | 20 | 3 | 9 | 15 | 17 | 25 | 34 | 39 | 43 | 46 | 49 | 58 | 60 | 62 | 67 |  |  |  |
| Definitive | 50N | Carbon Tetrachloride | 20 | -1 | 13 | 20 | 26 | 35 | 38 | 45 | 51 | 58 | 65 | 71 | 74 | 80 | 84 |  |  |  |
| Definitive | 51T | Carbon Tetrachloride | 92.8 | 1 | 10 | 15 | 17 | 23 | 29 | 32 | 36 | 40 | 47 | 53 | 56 | 60 | 65 |  |  |  |
| Definitive | 51B | Carbon Tetrachloride | 92.8 | -2 | 8 | 14 | 18 | 20 | 25 | 26 | 32 | 39 | 46 | 49 | 51 | 55 | 58 |  |  |  |
| Definitive | 51N | Carbon Tetrachloride | 92.8 | -2 | 9 | 16 | 20 | 24 | 27 | 30 | 37 | 42 | 47 | 51 | 52 | 55 | 62 |  |  |  |
| Definitive | 52T | Carbon Tetrachloride | 92.8 | -1 | 10 | 17 | 23 | 31 | 34 | 41 | 43 | 46 | 55 | 60 | 64 | 69 | 70 |  |  |  |
| Definitive | 52N | Carbon Tetrachloride | 92.8 | 2 | 10 | 15 | 21 | 29 | 29 | 33 | 44 | 43 | 52 | 57 | 62 | 65 | 67 |  |  |  |
| Definitive | 47T | Carbon Tetrachloride | 200.0 | -4 | 3 | 10 | 16 | 20 | 27 | 31 | 38 | 41 | 45 | 49 | 55 | 55 | 58 |  |  |  |
| Definitive | 47B | Carbon Tetrachloride | 200.0 | -1 | 5 | 12 | 18 | 24 | 26 | 32 | 35 | 40 | 47 | 51 | 56 | 60 | 64 |  |  |  |
| Definitive | 47N | Carbon Tetrachloride | 200.0 | -8 | 0 | 9 | 15 | 19 | 20 | 27 | 28 | 33 | 38 | 40 | 41 | 44 | 46 |  |  |  |
| Definitive | 48T | Carbon Tetrachloride | 200.0 | -3 | 5 | 8 | 11 | 19 | 21 | 24 | 25 | 31 | 38 | 36 | 39 | 42 | 42 |  |  |  |
| Definitive | 48N | Carbon Tetrachloride | 200.0 | -9 | -4 | -7 | 7 | 6 | 11 | 13 | 19 | 21 | 28 | 25 | 33 | 31 | 33 |  |  |  |

| **Supplemental Table 2-5.** Cumulative body weight gain following 28 days administration of carbon tetrachloride | | | | | | | | | | | | | | | | | | | | | | | | | | | | |  |  |  |
| --- | --- | --- | --- | --- | --- | --- | --- | --- | --- | --- | --- | --- | --- | --- | --- | --- | --- | --- | --- | --- | --- | --- | --- | --- | --- | --- | --- | --- | --- | --- | --- |
|  |  |  |  | **Weight Gain (g/day)** | | | | | | | | | | | | | | | | | | | | | | | | | | | |
| **Study** | **Animal Number** | **Toxicant** | **Dose (mg/kg)** | **1** | **2** | **3** | **4** | **5** | **6** | **7** | **8** | **9** | **10** | **11** | **12** | **13** | **14** | **15** | **16** | **17** | **18** | **19** | **20** | **21** | **22** | **23** | **24** | **25** | **26** | **27** | **28** |
| Definitive | 29T | CTa | 0 | 1 | 12 | 14 | 20 | 22 | 26 | 29 | 30 | 32 | 38 | 43 | 48 | 52 | 50 | 54 | 58 | 64 | 63 | 68 | 72 | 71 | 73 | 80 | 80 | 89 | 82 | 88 | 94 |
| Definitive | 29B | CT | 0 | 3 | 10 | 14 | 21 | 31 | 28 | 32 | 34 | 42 | 48 | 53 | 59 | 60 | 64 | 65 | 72 | 75 | 79 | 78 | 84 | 83 | 91 | 96 | 98 | 104 | 101 | 106 | 110 |
| Definitive | 29N | CT | 0 | 0 | 6 | 13 | 18 | 26 | 24 | 30 | 30 | 32 | 41 | 41 | 49 | 45 | 48 | 49 | 53 | 56 | 61 | 60 | 64 | 65 | 71 | 73 | 77 | 85 | 81 | 84 | 88 |
| Definitive | 30T | CT | 0 | 3 | 8 | 16 | 18 | 22 | 25 | 28 | 32 | 36 | 39 | 40 | 49 | 52 | 59 | 58 | 61 | 63 | 66 | 68 | 71 | 70 | 77 | 77 | 81 | 87 | 85 | 91 | 92 |
| Definitive | 30N | CT | 0 | 7 | 14 | 17 | 21 | 25 | 28 | 29 | 34 | 37 | 40 | 44 | 47 | 52 | 52 | 56 | 59 | 60 | 63 | 67 | 68 | 67 | 72 | 75 | 80 | 87 | 83 | 87 | 89 |
| Definitive | 33T | CT | 20 | 1 | 5 | 10 | 13 | 16 | 17 | 19 | 27 | 29 | 34 | 38 | 44 | 41 | 46 | 52 | 54 | 58 | 62 | 63 | 69 | 66 | 73 | 78 | 78 | 79 | 81 | 87 | 88 |
| Definitive | 33B | CT | 20 | -1 | 6 | 11 | 20 | 25 | 26 | 26 | 30 | 36 | 39 | 41 | 48 | 47 | 51 | 55 | 58 | 57 | 65 | 66 | 68 | 69 | 71 | 77 | 79 | 81 | 82 | 84 | 86 |
| Definitive | 33N | CT | 20 | -1 | 8 | 14 | 18 | 27 | 27 | 29 | 31 | 36 | 39 | 41 | 46 | 51 | 52 | 54 | 56 | 59 | 66 | 70 | 73 | 74 | 75 | 82 | 82 | 85 | 86 | 89 | 93 |
| Definitive | 34T | CT | 20 | -1 | 5 | 8 | 15 | 21 | 24 | 28 | 31 | 35 | 36 | 42 | 45 | 48 | 53 | 57 | 58 | 55 | 62 | 65 | 72 | 69 | 75 | 81 | 80 | 85 | 83 | 85 | 90 |
| Definitive | 34N | CT | 20 | 1 | 9 | 11 | 18 | 23 | 24 | 24 | 32 | 37 | 38 | 44 | 48 | 47 | 50 | 54 | 56 | 53 | 62 | 62 | 75 | 66 | 74 | 80 | 78 | 80 | 82 | 86 | 90 |
| Definitive | 35T | CT | 92.8 | -3 | 0 | 1 | 4 | 9 | 12 | 12 | 14 | 20 | 29 | 28 | 36 | 32 | 38 | 38 | 44 | 46 | 51 | 49 | 49 | 52 | 57 | 60 | 58 | 63 | 55 | 62 | 60 |
| Definitive | 35B | CT | 92.8 | 1 | 7 | 4 | 7 | 12 | 18 | 24 | 28 | 29 | 34 | 38 | 44 | 43 | 46 | 50 | 53 | 52 | 53 | 54 | 54 | 61 | 64 | 65 | 64 | 68 | 65 | 69 | 69 |
| Definitive | 35N | CT | 92.8 | 0 | 3 | 3 | 7 | 13 | 17 | 19 | 18 | 28 | 35 | 38 | 41 | 42 | 48 | 52 | 56 | 60 | 60 | 60 | 62 | 63 | 70 | 73 | 74 | 79 | 74 | 80 | 77 |
| Definitive | 36T | CT | 92.8 | -2 | 6 | 6 | 13 | 15 | 15 | 21 | 26 | 26 | 32 | 34 | 36 | 39 | 42 | 47 | 46 | 45 | 51 | 54 | 54 | 55 | 59 | 63 | 61 | 67 | 63 | 71 | 74 |
| Definitive | 36N | CT | 92.8 | -1 | -1 | 3 | 5 | 10 | 14 | 17 | 19 | 22 | 27 | 30 | 33 | 36 | 36 | 40 | 42 | 43 | 47 | 50 | 52 | 55 | 57 | 62 | 61 | 66 | 63 | 70 | 72 |
| Definitive | 31T | CT | 200.0 | -3 | 0 | 3 | 11 | 11 | 11 | 17 | 20 | 20 | 22 | 23 | 27 | 27 | 27 | 28 | 29 | 34 | 35 | 37 | 38 | 38 | 42 | 41 | 40 | 44 | 43 | 43 | 45 |
| Definitive | 31B | CT | 200.0 | -9 | -4 | -4 | 2 | 2 | 5 | 2 | 8 | 11 | 13 | 15 | 18 | 17 | 17 | 21 | 22 | 25 | 26 | 26 | 24 | 26 | 24 | 25 | 22 | 22 | 18 | 23 | 23 |
| Definitive | 31N | CT | 200.0 | -4 | -1 | 2 | 8 | 13 | 14 | 15 | 22 | 24 | 27 | 27 | 33 | 30 | 33 | 35 | 33 | 40 | 38 | 41 | 46 | 40 | 42 | 43 | 39 | 44 | 40 | 40 | 33 |
| Definitive | 32T | CT | 200.0 | 3 | 2 | 8 | 11 | 17 | 22 | 25 | 31 | 30 | 35 | 37 | 40 | 41 | 44 | 46 | 52 | 53 | 44 | 54 | 58 | 60 | 60 | 61 | 66 | 63 | 70 | 73 | 83 |
| Definitive | 32N | CT | 200.0 | -3 | 2 | 3 | 5 | 10 | 14 | 13 | 18 | 22 | 27 | 26 | 31 | 33 | 34 | 35 | 34 | 38 | 28 | 38 | 41 | 41 | 32 | 27 | 28 | 32 | 26 | 24 | 32 |

a CT, carbon tetrachloride
